# Supplementary material for: Design of a Diagnostic Immunoassay for Aflatoxin M1 Based on a Plant-Produced Antibody
Source: MDPI journal article supplement (doi:10.3390/toxins14120851), 2022-12-03
Supplement: s1 [file s1]

## Figures

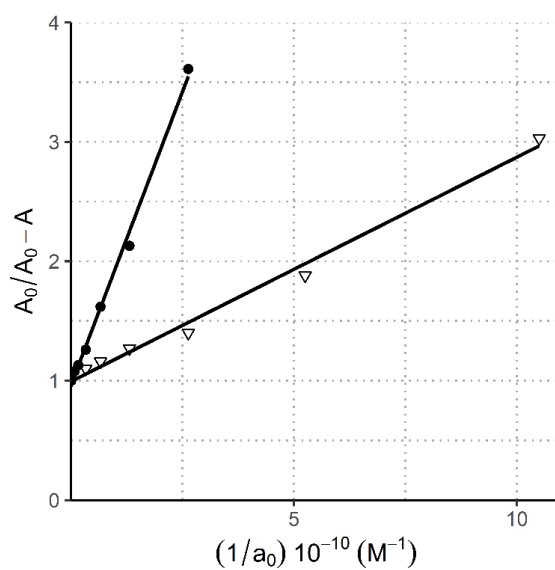

**Figure S1.** Scatchard plot of the binding of the two mAbs ( $\nabla$ , 5H3;  $\bullet$ , 2G3), measured by indirect competitive ELISA.

## Tables

**Table S1.** Scheme used for the back-calculation to build the error curve.

| Intra-assay |             |           |                           | Inter-assay               |               |                           |
|-------------|-------------|-----------|---------------------------|---------------------------|---------------|---------------------------|
|             | Calibration | ‘Unknown’ | Result<br>(AFM1,<br>ng/L) | Calibration               | ‘Unknown’     | Result<br>(AFM1,<br>ng/L) |
| Day 1       | Rep1,2      | Rep3      | Calc1_1                   | Rep1,2,3@day1,2,3         | Rep1,2,3@day1 | Calc1                     |
|             | Rep1,3      | Rep2      | Calc2_1                   |                           |               |                           |
|             | Rep2,3      | Rep1      | Calc3_1                   |                           |               |                           |
| Day 2       | Rep1,2      | Rep3      | Calc2_1                   |                           | Rep1,2,3@day2 | Calc2                     |
|             | Rep1,3      | Rep2      | Calc2_2                   |                           |               |                           |
|             | Rep2,3      | Rep1      | Calc2_3                   |                           |               |                           |
| Day 3       | Rep1,2      | Rep3      | Calc3_1                   |                           | Rep1,2,3@day3 | Calc3                     |
|             | Rep1,3      | Rep2      | Calc3_2                   |                           |               |                           |
|             | Rep2,3      | Rep1      | Calc3_3                   |                           |               |                           |
|             |             |           | Mean,<br>SD, CV%<br>(n=9) |                           |               |                           |
|             |             |           |                           | Mean,<br>SD, CV%<br>(n=3) |               |                           |

Each calibrator was measured in three replicates (Rep) on each day for three non consecutive days. The intra-assay inaccuracy was calculated by using the mean of two replicates for the calibration curve and the third as an unknown sample. The estimated concentration for the unknown samples (Calc) was divided by the nominal value of the calibrators and reported as percentage (%Err). The imprecision and inaccuracy were calculated for each level as the mean of three replicates of bac-calculated concentrations. For the inter-assay inaccuracy, the same data were used; however, the calibration curve was obtained by considering all replicates (*n* = 9) and the mean of the three replicates was used as the unknown sample to obtain Calc. Again, the imprecision and inaccuracy were estimated from the mean and standard deviation of Calc values.
